# Supplementary material for: Changes in metabolic complications in patients with alcoholic fatty liver disease monitored over two decades: NAGALA study
Source: PubMed Central journal article supplement — BMJ Open Gastroenterol. 2020 Apr 6;7(1):e000359. doi: 10.1136/bmjgast-2019-000359 (PMC7170409; doi:10.1136/bmjgast-2019-000359), 2020-04-06
Supplement: bmjgast-2019-000359supp001.pdf [file bmjgast-2019-000359supp001.pdf]

Supplementary Table 1. Age-specific prevalence of fatty liver

|               | Past              | Current              | <i>P</i> | Past                | Current              | <i>P</i> |
|---------------|-------------------|----------------------|----------|---------------------|----------------------|----------|
| <b>Male</b>   | <b>Nondrinker</b> |                      |          | <b>Intermediate</b> |                      |          |
| 20s           | 20.3% (25/123)    | 18.9% (17/90)        | 0.932    | 25% (3/12)          | 16.7% (1/6)          | 0.841    |
| 30s           | 24.2% (221/913)   | 26.5%<br>(615/2320)  | 0.193    | 20.3% (25/123)      | 31.9% (65/204)       | 0.033    |
| 40s           | 27.7% (342/1235)  | 38.2%<br>(1157/3028) | <0.001   | 21% (51/243)        | 32.3% (123/381)      | 0.003    |
| 50s           | 24% (284/1183)    | 42.4%<br>(1212/2861) | <0.001   | 19.8% (59/298)      | 35.8% (175/489)      | <0.001   |
| 60s           | 19.6% (56/286)    | 41.6%<br>(506/1216)  | <0.001   | 26.9% (14/52)       | 32.8% (86/262)       | 0.502    |
| 70s           | 19.5% (8/41)      | 24% (50/208)         | 0.671    | 12.5% (1/8)         | 26.7% (12/45)        | 0.680    |
| 80s           | 25% (1/4)         | 25% (3/12)           | 0.505    | ND (0/0)            | 40% (2/5)            | ND       |
|               | <b>Drinker</b>    |                      |          | <b>Total</b>        |                      |          |
| 20s           | 0% (0/2)          | 0% (0/2)             | ND       | 20.4% (28/137)      | 18.4% (18/98)        | 0.820    |
| 30s           | 26.7% (16/60)     | 24.1% (14/58)        | 0.917    | 23.9%<br>(262/1096) | 26.9%<br>(694/2582)  | 0.066    |
| 40s           | 18.4% (18/98)     | 32.5%<br>(50/154)    | 0.021    | 26.1%<br>(411/1576) | 37.3%<br>(1330/3563) | <0.001   |
| 50s           | 21.4% (22/103)    | 40% (94/235)         | 0.001    | 23% (365/1584)      | 41.3%<br>(1481/3585) | <0.001   |
| 60s           | 35.3% (6/17)      | 43.8% (39/89)        | 0.701    | 21.4% (76/355)      | 40.3%<br>(631/1567)  | <0.001   |
| 70s           | 33.3% (1/3)       | 28.6% (2/7)          | 0.547    | 19.2% (10/52)       | 24.6% (64/260)       | 0.513    |
| 80s           | ND (0/0)          | 100% (1/1)           | ND       | 25% (1/4)           | 33.3% (6/18)         | 0.787    |
| <b>Female</b> | <b>Nondrinker</b> |                      |          | <b>Intermediate</b> |                      |          |
| 20s           | 0.8% (1/119)      | 3.1% (6/193)         | 0.357    | 0% (0/4)            | 0% (0/3)             | ND       |
| 30s           | 2.8% (17/601)     | 4.4%<br>(72/1644)    | 0.122    | 11.8% (2/17)        | 4.9% (2/41)          | 0.709    |
| 40s           | 8.4% (76/905)     | 9.5%<br>(270/2834)   | 0.340    | 7.7% (2/26)         | 6.3% (6/96)          | 0.855    |
| 50s           | 14.5% (112/773)   | 19.5%<br>(456/2340)  | 0.002    | 20% (4/20)          | 10.3% (8/78)         | 0.422    |

|     |                |                    |       |                 |                     |       |
|-----|----------------|--------------------|-------|-----------------|---------------------|-------|
| 60s | 17.8% (30/169) | 24.9%<br>(191/767) | 0.060 | 12.5% (1/8)     | 5.6% (1/18)         | 0.854 |
| 70s | 4.8% (1/21)    | 21.1%<br>(28/133)  | 0.140 | ND (0/0)        | ND (0/0)            | ND    |
| 80s | 0% (0/2)       | 25% (2/8)          | 0.843 | ND (0/0)        | ND (0/0)            | ND    |
|     | Drinker        |                    |       | Total           |                     |       |
| 20s | 0% (0/2)       | ND (0/0)           | ND    | 0.8% (1/125)    | 3.1% (6/196)        | 0.337 |
| 30s | 16.7% (1/6)    | 9.4% (3/32)        | 0.849 | 3.2% (20/624)   | 4.5% (77/1717)      | 0.209 |
| 40s | 9.1% (1/11)    | 12.5% (8/64)       | 0.857 | 8.4% (79/942)   | 9.5% (284/2994)     | 0.341 |
| 50s | 10% (1/10)     | 20% (9/45)         | 0.773 | 14.6% (117/803) | 19.2%<br>(473/2463) | 0.004 |
| 60s | 100% (1/1)     | 20% (3/15)         | 0.516 | 18% (32/178)    | 24.4% (195/800)     | 0.084 |
| 70s | ND (0/0)       | ND (0/0)           | ND    | 4.8% (1/21)     | 21.1% (28/133)      | 0.140 |
| 80s | ND (0/0)       | ND (0/0)           | ND    | 0% (0/2)        | 25% (2/8)           | 0.843 |

The chi-squared test was used. The data are expressed as percentage (n/total number).
