# Supplementary material for: Changes in metabolic complications in patients with alcoholic fatty liver disease monitored over two decades: NAGALA study
Source: PubMed Central journal article supplement — BMJ Open Gastroenterol. 2020 Apr 6;7(1):e000359. doi: 10.1136/bmjgast-2019-000359 (PMC7170409; doi:10.1136/bmjgast-2019-000359), 2020-04-06
Supplement: bmjgast-2019-000359supp002.pdf [file bmjgast-2019-000359supp002.pdf]

Supplementary Table 2. Basic characteristics of nondrinkers

| Characteristic                    | Male            |                 | P value | Female          |                 | P value |
|-----------------------------------|-----------------|-----------------|---------|-----------------|-----------------|---------|
|                                   | Past            | Current         |         | Past            | Current         |         |
|                                   | 3786            | 9739            |         | 3786            | 9739            |         |
| Fatty liver, %<br>(n)             | 24.7%<br>(937)  | 36.6% (3560)    | <0.001  | 9.1% (237)      | 12.9% (1025)    | <0.001  |
| Diabetes, %<br>(n)                | 13.1%<br>(495)  | 8.6% (841)      | <0.001  | 5.7% (148)      | 2.7% (216)      | <0.001  |
| High BMI, %<br>(n)                | 21.5%<br>(814)  | 27.7% (2698)    | <0.001  | 12.4% (322)     | 12.9% (1025)    | 0.56    |
| High blood<br>pressure, % (n)     | 29%<br>(1098)   | 33.3% (3242)    | <0.001  | 20.1% (522)     | 17.2% (1372)    | 0.001   |
| High blood<br>glucose, % (n)      | 11.4%<br>(430)  | 19.1% (1861)    | <0.001  | 4% (104)        | 6.6% (525)      | <0.001  |
| High<br>triglycerides,<br>% (n)   | 33.2%<br>(1255) | 12.5% (1220)    | <0.001  | 10% (257)       | 2.8% (224)      | <0.001  |
| Low HDL-<br>cholesterol, %<br>(n) | 39.9%<br>(1509) | 8.5% (830)      | <0.001  | 39.2%<br>(1015) | 6.9% (547)      | <0.001  |
| Exerciser, %<br>(n)               | 18.6%<br>(704)  | 21.2% (2043)    | 0.001   | 18.4% (478)     | 16.9% (1328)    | 0.077   |
| Never<br>smoker, % (n)            | 24.3%<br>(899)  | 39.1% (3756)    | <0.001  | 86.1%<br>(2182) | 87.6% (6941)    | <0.001  |
| Ex-smoker, %<br>(n)               | 26.6%<br>(983)  | 35.4% (3401)    |         | 4.4% (111)      | 8% (630)        |         |
| Current<br>smoker, % (n)          | 49.1%<br>(1818) | 25.5% (2451)    |         | 9.5% (240)      | 4.4% (348)      |         |
| Autonomous<br>examinees, %<br>(n) | 13.8%<br>(522)  | 12.2%<br>(1186) | 0.012   | 14.8%<br>(384)  | 15.5%<br>(1234) | 0.41    |
| Age, years                        | 47 (39-<br>55)  | 48 (40-56)      | <0.001  | 46 (39-54)      | 47 (40-55)      | <0.001  |

|                                         |                            |                            |        |                            |                        |        |
|-----------------------------------------|----------------------------|----------------------------|--------|----------------------------|------------------------|--------|
| BMI, kg/m <sup>2</sup>                  | 22.9<br>(21.1-<br>24.7)    | 23.1 (21.3-<br>25.3)       | <0.001 | 21.4 (19.7-<br>23.5)       | 20.7 (19.1-<br>23)     | <0.001 |
| Systolic blood<br>pressure,<br>mmHg     | 119.5<br>(109.5-<br>131)   | 119.5<br>(110.5-<br>129.5) | <0.001 | 112.5 (103-<br>125.5)      | 110 (101-<br>122)      | <0.001 |
| Diastolic<br>blood<br>pressure,<br>mmHg | 75 (68.5-<br>83)           | 74 (67-82)                 | <0.001 | 70 (64-78)                 | 66 (59.5-74)           | <0.001 |
| Fasting blood<br>glucose,<br>mg/dL      | 93 (87-<br>100)            | 100 (94-107)               | <0.001 | 88 (82-94)                 | 93 (89-99)             | <0.001 |
| HbA1c, %                                | 5.7 (5.4-<br>6.1)          | 5.4 (5.2-5.6)              | <0.001 | 5.6 (5.2-<br>5.9)          | 5.4 (5.2-5.5)          | <0.001 |
| Total<br>cholesterol,<br>mg/dL          | 199 (176-<br>224)          | 202 (180-<br>224)          | 0.007  | 201 (175-<br>228)          | 202 (180-<br>227)      | 0.001  |
| Triglycerides,<br>mg/dL                 | 116 (82-<br>168)           | 77 (53-112)                | <0.001 | 78.5 (56-<br>109)          | 50 (36-72)             | <0.001 |
| HDL<br>cholesterol,<br>mg/dL            | 42.5 (36-<br>51)           | 55 (47-66)                 | <0.001 | 54 (45-<br>63.1)           | 72 (61-84)             | <0.001 |
| LDL<br>cholesterol,<br>mg/dL            | 127.4<br>(105.4-<br>151.7) | 126 (105.8-<br>146.4)      | <0.001 | 128 (105-<br>152.6)        | 116.6 (97.3-<br>138.4) | <0.001 |
| Non-HDL<br>cholesterol,<br>mg/dL        | 154.6<br>(130.4-<br>181.2) | 144 (121-<br>167)          | <0.001 | 145.7<br>(120.8-<br>173.7) | 128 (107-<br>152)      | <0.001 |
| AST, IU/L                               | 20 (18-<br>23)             | 16 (13-21)                 | <0.001 | 18 (16-21)                 | 14 (11-17)             | <0.001 |
| ALT, IU/L                               | 17 (12-<br>25)             | 19 (14-27)                 | <0.001 | 11 (9-15)                  | 12 (9-16)              | <0.001 |
| GGT, IU/L                               | 26 (16-<br>45)             | 21 (15-31)                 | <0.001 | 11 (8-17)                  | 13 (10-17)             | 0.13   |

|                               |                     |                    |        |                     |                     |        |
|-------------------------------|---------------------|--------------------|--------|---------------------|---------------------|--------|
| Alb, g/dL                     | 4.4 (4.2-4.6)       | 4.4 (4.2-4.5)      | <0.001 | 4.3 (4.1-4.4)       | 4.2 (4.1-4.4)       | <0.001 |
| Platelet, 10 <sup>3</sup> /mL | 22.7 (19.7-26.1)    | 22.4 (19.4-25.9)   | 0.016  | 23.6 (20.5-27.5)    | 23.6 (20.3-27.4)    | 0.69   |
| FIB4 index                    | 0.97 (0.74-1.3)     | 0.78 (0.56-1.08)   | <0.001 | 1 (0.78-1.3)        | 0.76 (0.55-1.03)    | <0.001 |
| NAFLD Fibrosis score          | -2.33 (-3.05--1.55) | -2.52 (-3.24--1.7) | <0.001 | -2.21 (-2.87--1.53) | -2.67 (-3.34--2.02) | <0.001 |
| Alcohol consumption, mg/week  | 54 (0-126)          | 12 (1-66)          | <0.001 | 0 (0-12)            | 46 (40-53)          | <0.001 |

The chi-squared test was applied to categorical variables and t-test was applied to continuous variables.

Categorical variables are expressed as percentage (n). Continuous variables are expressed as median (IQR).

Alb, albumin; ALT, alanine aminotransferase; AST, aspartate aminotransferase; BMI, body mass index,

GGT,  $\gamma$ -glutamyl transpeptidase; HbA1c, hemoglobin A1c; HDL, high-density lipoprotein; LDL, low-

density lipoprotein
