# Supplementary material for: Changes in metabolic complications in patients with alcoholic fatty liver disease monitored over two decades: NAGALA study
Source: PubMed Central journal article supplement — BMJ Open Gastroenterol. 2020 Apr 6;7(1):e000359. doi: 10.1136/bmjgast-2019-000359 (PMC7170409; doi:10.1136/bmjgast-2019-000359), 2020-04-06
Supplement: bmjgast-2019-000359supp003.pdf [file bmjgast-2019-000359supp003.pdf]

Supplementary Table 3. The prevalence of drinkers categorized by sex and ages.

| Male          | The study cohort | Japan National<br>nutrition survey | The study cohort | Japan National<br>nutrition survey |
|---------------|------------------|------------------------------------|------------------|------------------------------------|
|               | 1994-1997        | 1995                               | 2014-2017        | 2015                               |
| 20s           | 10.2%(14/137)    | 34.9%                              | 8.2%(8/98)       | 9.4%                               |
| 30s           | 16.7%(183/1096)  | 59.2%                              | 10.1%(262/2582)  | 29.5%                              |
| 40s           | 21.6%(341/1576)  | 64.6%                              | 15%(535/3563)    | 36.2%                              |
| 50s           | 25.3%(401/1584)  | 62.5%                              | 20.2%(724/3585)  | 46.4%                              |
| 60s           | 19.4%(69/355)    | 53.9%                              | 22.3%(351/1571)  | 43.2%                              |
| ≥70s          | 19.6%(11/56)     | 41%                                | 20.9%(58/278)    | 25.5%                              |
| <b>Female</b> |                  |                                    |                  |                                    |
| 20s           | 10.2%(14/137)    | 6.1%                               | 8.2%(8/98)       | 5.1%                               |
| 30s           | 16.7%(183/1096)  | 8.9%                               | 10.1%(262/2582)  | 8.6%                               |
| 40s           | 21.6%(341/1576)  | 10%                                | 15%(535/3563)    | 13.5%                              |
| 50s           | 25.3%(401/1584)  | 7.6%                               | 20.2%(724/3585)  | 13.5%                              |
| 60s           | 19.4%(69/355)    | 6%                                 | 22.3%(351/1571)  | 7.1%                               |
| ≥70s          | 19.6%(11/56)     | 4.4%                               | 20.9%(58/278)    | 1.5%                               |

The chi-squared test was applied to categorical variables. Categorical variables are expressed as percentage

(n). The prevalence of drinker in Japan National Nutrition Survey 1995 or 2015 was expressed

([https://www.mhlw.go.jp/bunya/kenkou/kenkou\\_eiyou\\_chousa.html](https://www.mhlw.go.jp/bunya/kenkou/kenkou_eiyou_chousa.html))
